# Supplementary material for: Well-dispersed graphene-polydopamine-Pd hybrid with enhanced catalytic performance
Source: Royal Society of Chemistry journal article supplement (doi:10.1039/c5ra13361k), 2015-01-01
Supplement: c5ra13361k1.pdf [file c5ra13361k1.pdf]

## **Supplementary Information**

### **Well-dispersive graphene-polydopamine-Pd hybrid with enhanced catalytic performance**

*Jian-Xin Ma, Honglei Yang, Shuwen Li, Ren Ren, Jing Li, Xueyao Zhang and Jiantai Ma\**

*State Key Laboratory of Applied Organic Chemistry, College of Chemistry and Chemical Engineering, Lanzhou University, Lanzhou, Gansu 730000, P. R. China.*

*E-mail: majiantai@lzu.edu.cn; Fax: +86-931-8912582; Tel: +86-931-8912577*

GPDA and polydopamine were characterized with Fourier-transform infrared (FTIR) spectrophotometer (Nicolet NEXUS 670 FTIR), as we can see in the Fig.s1. The pure graphene showed only a few weak absorption at  $1615\text{ cm}^{-1}$  from aromatic rings and  $3420\text{ cm}^{-1}$  from -OH group [1]. While polydopamine gave the same absorption at  $1615\text{ cm}^{-1}$  and  $3420\text{ cm}^{-1}$  that comes from a catechol group [2]. That indicates the similarity between graphene and PDA. Furthermore the Graphene-polydopamine hybrid mainly presented the absorption feature of polydopamine, indicating the graphene was successfully functionalized by polydopamine.

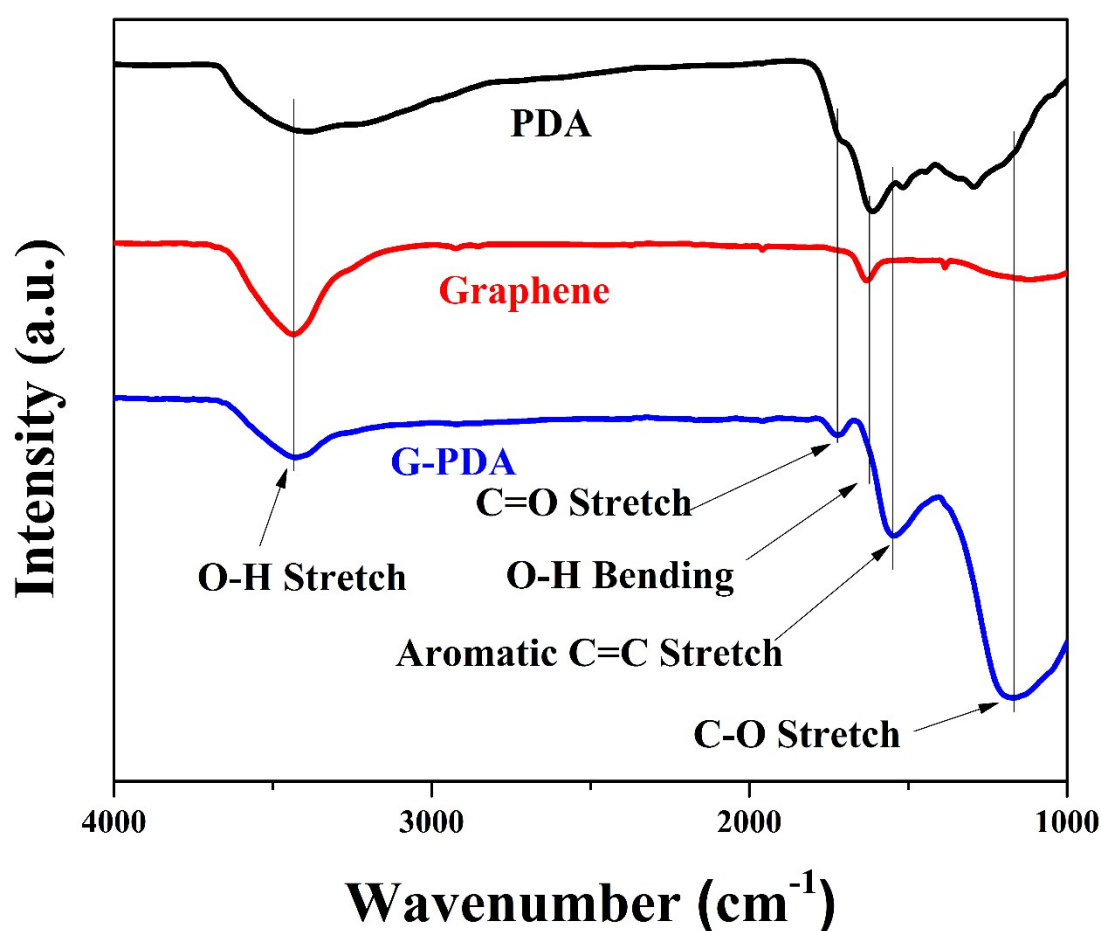

**Fig.s1** FTIR of PDA, graphene and GPDA.

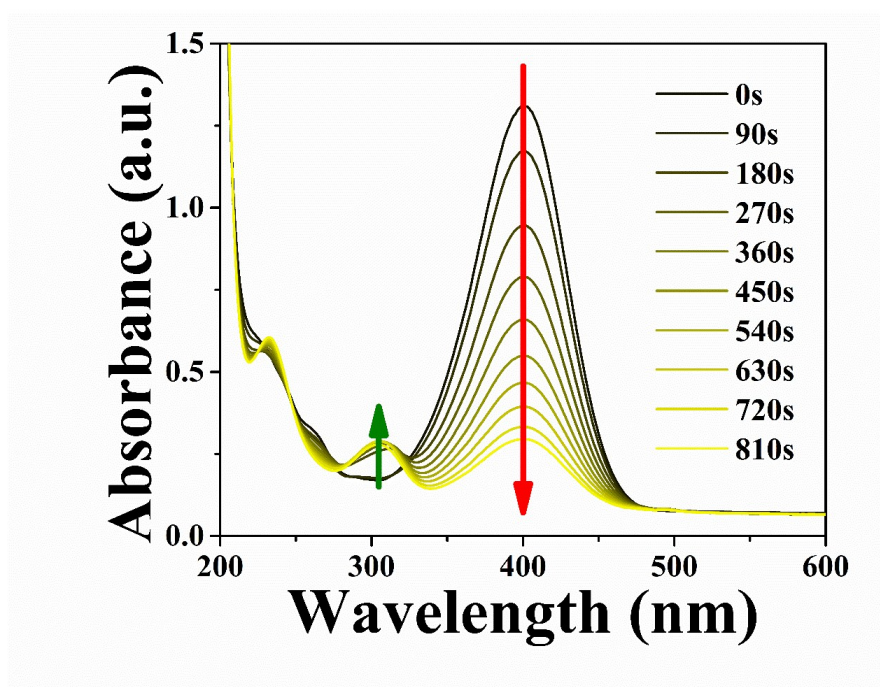

**Fig.s2** UV-visible absorption spectra of the reduction of 4-NP catalysed by GP

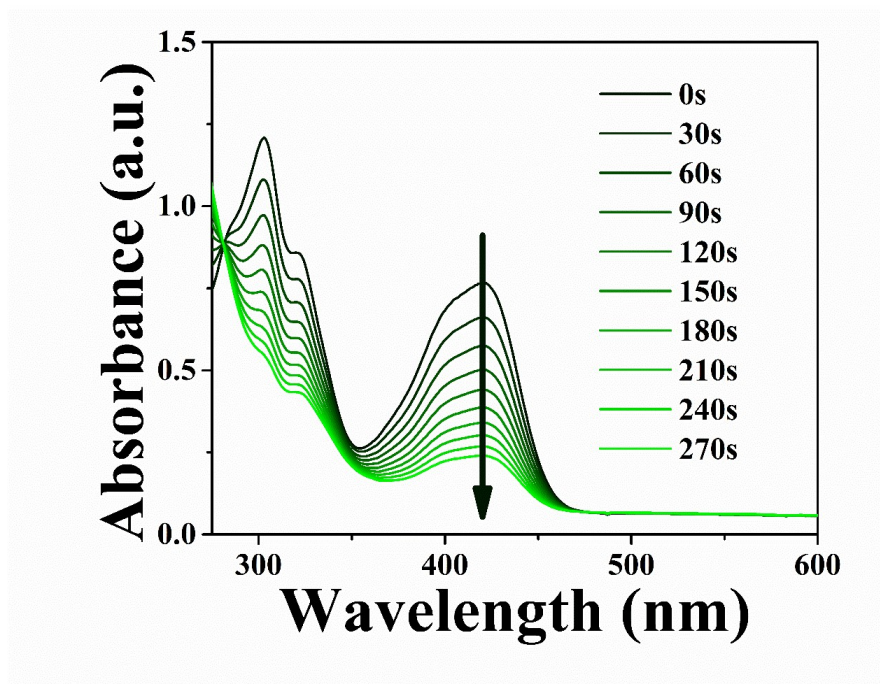

**Fig.s3** UV-visible absorption spectra of the reduction of  $K_3[Fe(CN)_6]$  catalysed by GP

**Table s1** Summary of the constants for the catalytic reductions

| Metals in catalyst | Substance | $k$ (s <sup>-1</sup> ) | Catalyst dosing after conversion | $k^*$ (s <sup>-1</sup> g <sup>-1</sup> ) | Reference |
|--------------------|-----------|------------------------|----------------------------------|------------------------------------------|-----------|
| Pd-Ni              | 4-NP      | $2.04 \times 10^{-2}$  | 0.4 mg                           | 51.0                                     | [3]       |
| Pd                 | 4-NP      | $6.58 \times 10^{-2}$  | 2 mg                             | 32.9                                     | [4]       |
| Pd                 | 4-NP      | $3.17 \times 10^{-4}$  | 4.6 $\mu$ g                      | 68.9                                     | [5]       |
| Pd                 | 4-NP      | $8.83 \times 10^{-3}$  | -                                | -                                        | [6]       |
| Au                 | 4-NP      | $2.1 \times 10^{-3}$   | 6 mg                             | 0.35                                     | [7]       |
| Au                 | 4-NP      | $6.06 \times 10^{-2}$  | 6 mg                             | 10.1                                     | [8]       |
| Au                 | 4-NP      | $3.9 \times 10^{-2}$   | 1 mg                             | 39                                       | [9]       |
| Cu                 | MB        | $6.55 \times 10^{-3}$  | 25 $\mu$ g                       | 262.0                                    | [10]      |
| Cu                 | RhB       | $1.35 \times 10^{-2}$  | 25 $\mu$ g                       | 540.0                                    | [10]      |

## References

- [1] V.H. Pham, T.V. Cuong, S.H. Hur, E. Oh, E.J. Kim, E.W. Shin, J.S. Chung, Chemical functionalization of graphene sheets by solvothermal reduction of a graphene oxide suspension in N-methyl-2-pyrrolidone, *J. Mater. Chem.*, 21 (2011) 3371-3377.
- [2] B. Fei, B. Qian, Z. Yang, R. Wang, W.C. Liu, C.L. Mak, J.H. Xin, Coating carbon nanotubes by spontaneous oxidative polymerization of dopamine, *Carbon*, 46 (2008) 1795-1797.
- [3] Z. Dong, X. Le, C. Dong, W. Zhang, X. Li, J. Ma, Ni@Pd core-shell nanoparticles modified fibrous silica nanospheres as highly efficient and recoverable catalyst for reduction of 4-nitrophenol and hydrodechlorination of 4-chlorophenol, *Applied Catalysis B: Environmental*, 162 (2015) 372-380.
- [4] S. Harish, J. Mathiyarasu, K.L.N. Phani, V. Yegnaraman, Synthesis of Conducting Polymer Supported Pd Nanoparticles in Aqueous Medium and Catalytic Activity Towards 4-Nitrophenol Reduction, *Catal. Lett.*, 128 (2009) 197-202.
- [5] M.A. Mahmoud, F. Saira, M.A. El-Sayed, Experimental Evidence For The Nanocage Effect In Catalysis With Hollow Nanoparticles, *Nano Lett.*, 10 (2010) 3764-3769.
- [6] Y. Gao, X. Ding, Z. Zheng, X. Cheng, Y. Peng, Template-free method to prepare polymer nanocapsules embedded with noble metal nanoparticles, *Chem. Commun.*, (2007) 3720-3722.
- [7] M.H. Rashid, R.R. Bhattacharjee, A. Kotal, T.K. Mandal, Synthesis of Spongy Gold Nanocrystals with Pronounced Catalytic Activities, *Langmuir*, 22 (2006) 7141-7143.
- [8] J. Huang, S. Vongehr, S. Tang, H. Lu, J. Shen, X. Meng, Ag Dendrite-Based Au/Ag Bimetallic Nanostructures with Strongly Enhanced Catalytic Activity, *Langmuir*, 25 (2009) 11890-11896.

- [9] J. Huang, S. Vongehr, S. Tang, H. Lu, X. Meng, Highly Catalytic Pd–Ag Bimetallic Dendrites, *The Journal of Physical Chemistry C*, 114 (2010) 15005-15010.
- [10] Y. Zhang, P. Zhu, L. Chen, G. Li, F. Zhou, D. Lu, R. Sun, F. Zhou, C.-p. Wong, Hierarchical architectures of monodisperse porous Cu microspheres: synthesis, growth mechanism, high-efficiency and recyclable catalytic performance, *Journal of Materials Chemistry A*, 2 (2014) 11966-11973.
